RESEARCH ARTICLE

# Children Reading to Dogs: A Systematic Review of the Literature

Sophie Susannah Hall<sup>1\*</sup>, Nancy R. Gee<sup>2</sup>, Daniel Simon Mills<sup>1</sup>

**1** School of Life Sciences, University of Lincoln, Lincoln, United Kingdom, **2** WALTHAM Centre for Pet Nutrition, Waltham on the Wolds, Leicestershire, United Kingdom

\* [shall@lincoln.ac.uk](mailto:shall@lincoln.ac.uk)

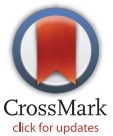

 OPEN ACCESS

**Citation:** Hall SS, Gee NR, Mills DS (2016) Children Reading to Dogs: A Systematic Review of the Literature. PLoS ONE 11(2): e0149759. doi:10.1371/journal.pone.0149759

**Editor:** Marina A. Pavlova, University of Tuebingen Medical School, GERMANY

**Received:** October 8, 2015

**Accepted:** February 4, 2016

**Published:** February 22, 2016

**Copyright:** © 2016 Hall et al. This is an open access article distributed under the terms of the [Creative Commons Attribution License](https://creativecommons.org/licenses/by/4.0/), which permits unrestricted use, distribution, and reproduction in any medium, provided the original author and source are credited.

**Data Availability Statement:** All relevant data are within the paper and its Supporting Information files.

**Funding:** NRG was employed by WALTHAM Centre for Pet Nutrition at the time of contributing to this paper. WALTHAM Centre for Pet Nutrition provided support in the form of salaries for authors [NRG], but did not have any additional role in the study design, data collection and analysis, decision to publish, or preparation of the manuscript. The specific roles of NRG are articulated in the 'author contributions' section.

**Competing Interests:** NRG was employed by WALTHAM Centre for Pet Nutrition whilst contributing

## Abstract

### Background

Despite growing interest in the value of human-animal interactions (HAI) to human mental and physical health the quality of the evidence on which postulated benefits from animals to human psychological health are based is often unclear. To date there exist no systematic reviews on the effects of HAI in educational settings specifically focussing on the perceived benefits to children of reading to dogs. With rising popularity and implementation of these programmes in schools, it is essential that the evidence base exploring the pedagogic value of these initiatives is well documented.

### Methods

Using PRISMA guidelines we systematically investigated the literature reporting the pedagogic effects of reading to dogs. Because research in this area is in the early stages of scientific enquiry we adopted broad inclusion criteria, accepting all reports which discussed measurable effects related to the topic that were written in English. Multiple online databases were searched during January-March 2015; grey literature searches were also conducted. The search results which met the inclusion criteria were evaluated, and discussed, in relation to the Oxford Centre for Evidence Based Medicine levels of evidence; 27 papers were classified as Level 5, 13 as Level 4, 7 as Level 2c and 1 as Level 2b.

### Conclusion

The evidence suggests that reading to a dog may have a beneficial effect on a number of behavioural processes which contribute to a positive effect on the environment in which reading is practiced, leading to improved reading performance. However, the evidence base on which these inferences are made is of low quality. There is a clear need for the use of higher quality research methodologies and the inclusion of appropriate controls in order to draw causal inferences on whether or how reading to dogs may benefit children's reading practices. The mechanisms for any effect remain a matter of conjecture.

to this paper. NRG worked on the paper in a research capacity, not in a commercial capacity. The affiliation with WALTHAM does not alter the authors' adherence to PLOS ONE policies on sharing data and materials.

## Introduction

Literacy skills have significant consequences to global health and economy. More than 796 million people in the world cannot read (approximately 15% of the population), resulting in world-wide costs of over USD \$1 trillion a year, with the effects of illiteracy being very similar in developing and developed countries [1]. Poor literacy skills have substantial health and welfare implications for society, having been associated with reduction in: health outcomes, economic growth, social participation, self-esteem and hygiene, as well as increased accidents and job absenteeism [2]. It is clear that reading skills have wide-reaching implications. Likewise, in the educational environment the effects of literacy are not just relevant to performance in English lessons, but also have wider implications, determining successful academic learning in all subjects [3] and being associated with overall school enjoyment [4]. In the past decade there has been a worrying decline in children's enjoyment, and therefore frequency, of reading [5]. Given that frequency of reading is directly related to reading attainment [3] it is essential that there are evidence-based interventions that increase children's motivation, enjoyment and frequency of reading. Despite increasing Government awareness for the necessity of improving student's motivation to read for pleasure [6] there is still no legitimised program to support this.

The first high profile programme to advocate children reading to dogs was established in 1999 by Intermountain Therapy Animals, who announced Reading Education Assistance Dogs (READ). Growing interest in reading to dog's programmes such as READ is observed in frequent media reports and is reflected in the subsequent development of a number of initiatives around the world including (but not limited to), The Bark and Read Foundation (Kennel Club, UK), Caring Canines, Dogs Helping Kids, Read2Dogs, Classroom Canines (Delta Society, Australia), SitStayRead, Library Dogs, Tail Waggin' Tutors (Therapy Dogs International), Reading with Rover, and All Ears Reading.

Proponents of READ postulate that reading to dogs helps motivate children to read by increasing relaxation and confidence, reducing blood pressure and offering a non-judgemental, safe environment in which to practice reading [7–8]. It is noted that READ (and similar organisations) do not supply evidence through control group comparisons to support these claims. However, in the wider literature there is evidence to suggest that improving reading motivation improves reading performance [9–11] indicating that if children are more motivated to read with a dog then this could improve their reading abilities. This may be especially important for students who struggle to read, because poor reading abilities are also associated with low reading motivation [4]. Also, below average readers often demonstrate increased reading anxiety; indeed, reading anxiety is a well observed form of 'classical conditioning' in the classroom environment [12]. For example, an initially neutral stimulus (e.g., reading out-loud) is repeatedly associated with a negative response (e.g., teacher judgement or peer ridicule), which results in the reader forming an association between reading and negative internal responses (e.g. anxiety, heightened emotions). Reading anxiety is common in children and is associated with physical symptoms, such as a reddening face, rapid breathing and tension headaches [13]. Evidence suggests that positive experiences can help the child to overcome negative associations and be more open to learning experiences [14] READ and similar programmes postulate that reading to a dog helps to overcome these (anxiety / motivation) roadblocks to developing reading expertise in the classroom. The silent companionship of a dog as a reading partner may allow the child to work at their own pace through reading challenges without fear of being judged. However, it is unclear what evidence exists to directly support the principles of READ (i.e., improved reading abilities through increased reading motivation and reduced reading anxiety).

The objective of this systematic review was to determine the scientific evidence base for the pedagogic effects of reading to dog’s programmes. We specifically focused on dependent measures such as reading speed and comprehension and/or learning behaviours in this evaluation of the available evidence. The aim was to objectively represent the current state of this developing field and in so doing we discuss all reports that investigated the reading abilities of children (under 16 years) in response to a reading to dog programme, even if they did not include a comparison group or use standardised tests. To illustrate the broad levels of scientific quality of the current data we report the finding in three stages; stage 1: results published in non-peer reviewed resources; stage 2: results published in peer-reviewed journals, but do not report original data; stage 3: reports of original data in a peer-reviewed journal, classified according to the hierarchy of evidence used by the Oxford Centre for Evidence Based Medicine (OCEBM) [15].

## Methods

The Preferred Reporting Items for Systematic Reviews and Meta-Analyses (PRISMA) guidelines were adhered to perform this systematic review [16] (S1 Appendix). No registered protocol exists for this review. The inclusion criteria for selection of articles included (a) literature that reports reading and/or behavioural effects of children (under 16 years, with or without a reading or developmental disability) reading to (in the presence of) dogs, and (b) articles written in English. With the aim of providing a comprehensive review of the current relevant literature we limited the number of specific restrictions for inclusion. We did not stipulate the nature (design details) of the intervention apart from ‘reading out-loud to dogs’, we included reports that collected data from a single time point, as well as studies that explore the effect of the intervention over time. We included reports that used both quantitative and qualitative measures of effect, including ad-hoc reports, making no stipulation on the use of outcome measures.

Literature searches were conducted in PubMed (1946-present), Science Direct (1946-present), American Doctoral Dissertations (1933–1955), Canadian Reference Centre (1901-present), Education Source (1900-present), ERIC (1966-present), Health Source: Nursing/Academic Edition (1952-present), MasterfilePremier (1921-present), PsycArticles (1984-present), PsychInfo (1987-present), Psychology & Behavioural Sciences Collection (1930-present), Social Sciences Full Text (1972-present), SocIndex with Full Text (1985-present) and Google Scholar (1946-present). In order to increase coverage, grey literature searches were conducted (search for relevant references used in the articles that were selected in stage 3). Table 1 contains the list of search terms used. Search terms were identified through analysis of commonly

**Table 1. Search Terms used in the Literature Search.**

|                                     |                                        |
|-------------------------------------|----------------------------------------|
| Dog(s) and reading                  | Reading assistance and dog(s)          |
| Canine(s) and reading               | Animal companionship and school        |
| Dog(s) and child(ren) and reading   | Animals(s) and school(s)               |
| Dog(s) and reading and student(s)   | Pet(s) and school(s)                   |
| Dog(s) and listening                | Pet(s) and learning                    |
| Dog(s) and listening and child(ren) | Animal(s) and learning and education   |
| Dog(s) and listening and student(s) | Dog(s) and learning and child(ren)     |
| Dog(s) and school(s)                | Dog(s) and cognition and child(ren)    |
| Dog(s) and classroom(s)             | Dogs(s) and child(ren) and performance |
| Dog(s) and literacy                 |                                        |

doi:10.1371/journal.pone.0149759.t001

referred to key terms and titles in articles pertaining to reading to dogs. Full text articles were sourced for all references electronically, or via direct contact with the authors.

### Results

The initial literature searches, using the terms specified in [Table 1](#) returned 149,218 results, with an additional 14 references obtained from grey literature searches contributing to a total of 149,232 references ([Fig 1](#)). After removing the topics that were not relevant to the aim of this paper and duplications of the maintained papers ([S2 Appendix](#)), 48 results were assessed against the OCEBM levels of evidence [[15](#)]. The OCEBM levels of evidence are designed to alert practitioners to the quality of evidence on which conclusions are based. The levels of evidence include: 1a: Systematic reviews (with homogeneity of variance) of Randomised Control

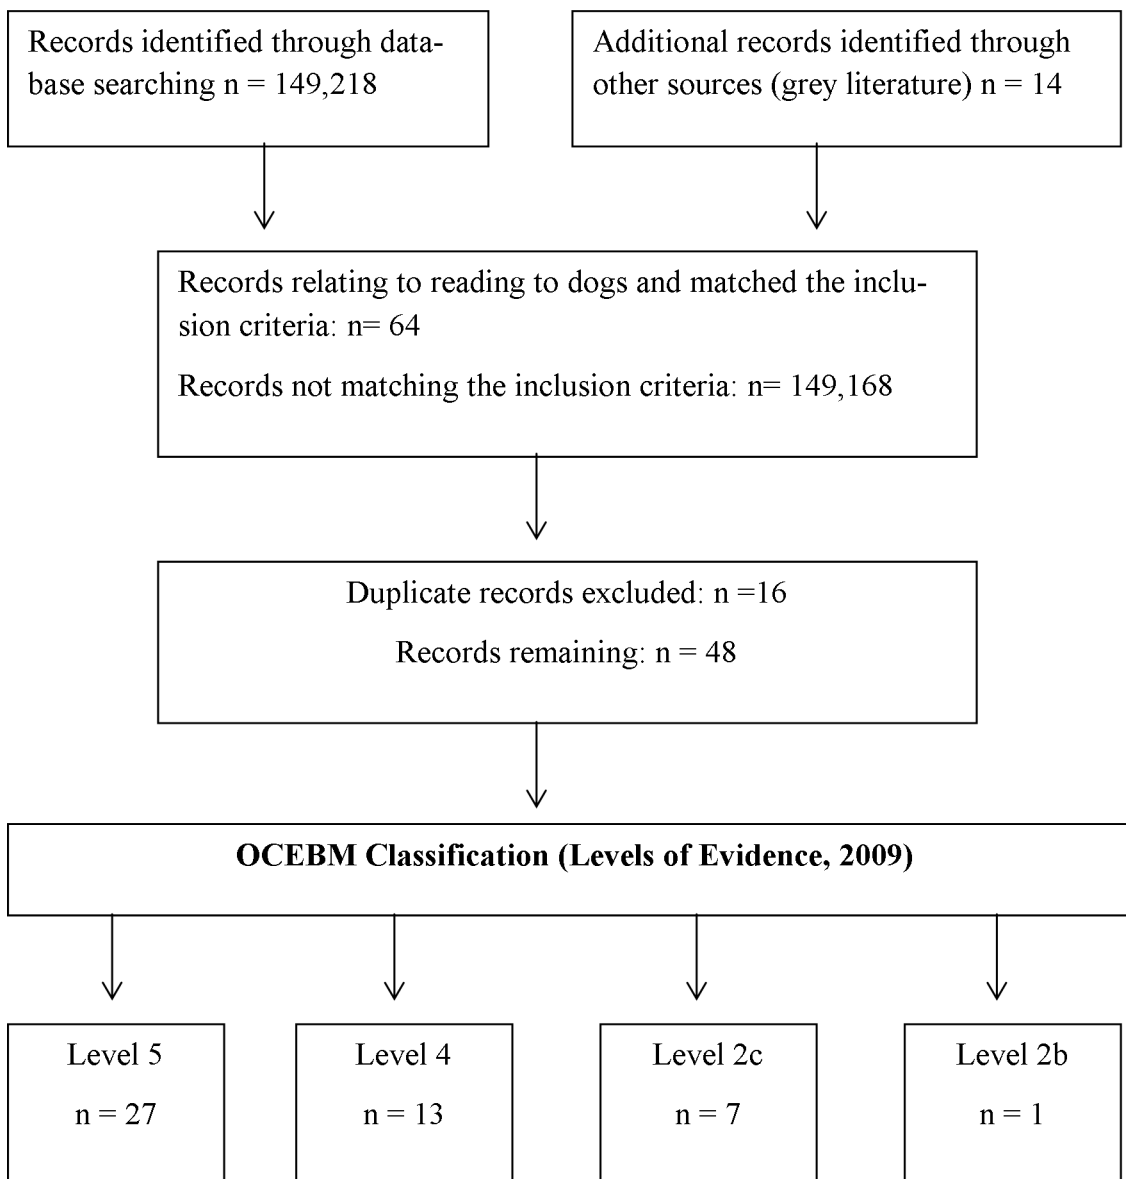

Fig 1. PRISMA (2009) Flow Diagram.

doi:10.1371/journal.pone.0149759.g001

Trials (RCTs). 1b: Individual RCTs with narrow confidence interval. 1c: All or none case series. 2a: Systematic reviews (with homogeneity) of cohort studies. 2b: Individual cohort studies, including low quality RCTs. 2c: Outcomes research, ecological studies. 3a: Systematic review (with homogeneity) of case-control studies. 3b: Individual case-control study. 4: Case series (and poor quality cohort and case control studies). 5: Expert opinion without explicit critical appraisal, or based on physiology, bench research or “first principles”. The authors (SSH, DSM) independently classified the papers with the OCEBM criteria and then met to discuss their ratings and resolve any discrepancies (step 1). NRG reviewed the ratings assigned (step 2), before submitting for independent review by two researchers not involved in any stage of the manuscript (step 3). No discrepancies occurred in stages 2 and 3. Discrepancies in stage 1 were not common, and involved a difference in rating by no more than 1 level. All discrepancies were resolved by reading the paper again to clarify understanding of the design and procedures.

Twenty-seven papers were ranked level 5, thirteen papers were ranked level 4, seven papers were ranked 2c, and one paper was ranked 2b. Specific details of the literature discussed can be found in [Table 2](#) and [Table 3](#).

### OCEBM Classification Level 5

Level 5 Evidence is “Expert opinion without explicit critical appraisal, or based on physiology, bench research or first principles” [15]. The majority of literature that met the search criteria was classified as Level 5 evidence ( $n = 27$ , 56%). Typically, these documents detailed ad-hoc reports of the effects of reading to a dog as evidenced by classroom teachers, or dog handlers. Many of the documents associated reading to a dog with behavioural changes, particularly, greater motivation to read to a dog, improved confidence when reading to a dog, and reduced signs of anxiety when reading to a dog [17–34]. Some documents also indicated that children reported feeling more supported when reading to a dog [22, 25, 35–38]. References to improvements in actual reading abilities were also noted, but not as frequently as changes to behavioural processes [19, 20, 24, 26–28, 31, 32, 37, 39–42]. Only a small number of documents made reference to any standardised tests that were used when making these judgements [40, 42]. A disengaged reader was reported as showing improvements on the Neale Analysis of Reading Ability (NARA) after taking part in a reading to a dog programme [42], and a child with autism spectrum disorder was reported as improving on the Dynamic Indicators of Early Literacy Skills (DIBELS) and Elementary Reading Attitudes Scale (ERAS) after completing a reading to a dog intervention [40]. However, these case studies did not use any control measures, or included a case series, and therefore were categorised as Level 5 evidence. These studies show some promise that reading to a dog can benefit children’s reading abilities by altering key behavioural process which may be important in contributing to an optimal learning environment, specifically, by increasing reading motivation and confidence, and reducing reading anxiety.

### OCEBM Classification Level 4

Level 4 evidence is classified as “Case series, and poor quality cohort and case control studies”.

Thirteen papers (27%) of the documents were classified as Level 4 evidence. Six of the 13 studies were case series studies that followed the progress of a small group of children as they took part in a reading to a dog intervention, but did not use standardised measures to assess the effects of the programme [43–48]. Four of the studies were based on children with reading disabilities, or below average reading skills [44, 45, 47, 48], one study involved children with autism spectrum disorder [43], and one study did not report the developmental status of their

**Table 2. Evidence for the Value of Children Reading to Dogs.**

| RefNo. | First Author (year) | CEBM Rating | N:Type           | Participant Age        | Developmental Status | Effects on Reading Skills             | Effects on Reading Behaviours                                                                      |
|--------|---------------------|-------------|------------------|------------------------|----------------------|---------------------------------------|----------------------------------------------------------------------------------------------------|
| 17     | Bueche (2003)       | 5           | NA:Opinion paper |                        |                      |                                       | Reduced reading anxiety, improved reading self-esteem                                              |
| 18     | Burns (2014)        | 5           | NA:Opinion paper |                        |                      |                                       | Reduced reading anxiety                                                                            |
| 19     | Dunlap (2010)       | 5           | NA:Opinion paper |                        |                      | Improved reading abilities            | Greater reading confidence                                                                         |
| 20     | Faver (2009)        | 5           | NA:Opinion paper |                        |                      | Improved language and literacy skills | Greater reading confidence                                                                         |
| 21     | Francis (2009)      | 5           | NA:Opinion paper |                        |                      |                                       | Increased reading motivation & confidence                                                          |
| 22     | Hughes (2002)       | 5           | NA:Opinion paper |                        |                      |                                       | Increased reading motivation & confidence                                                          |
| 23     | Inklebarger (2014)  | 5           | NA:Opinion paper |                        |                      |                                       | Increased reading motivation, reduced reading anxiety                                              |
| 24     | Jalongo (2005)      | 5           | NA:Opinion paper |                        |                      | Improved reading abilities            | Increased reading: motivation, self-esteem, enjoyment, feelings of support. Reduced reading stress |
| 25     | Kennel Club (2011)  | 5           | NA:Opinion paper |                        |                      |                                       | Increased reading confidence                                                                       |
| 26     | Klotz (2014)        | 5           | NA:Opinion paper |                        |                      | Improved reading abilities            | Increased reading: confidence, motivation, engagement. Reduced reading anxiety                     |
| 27     | Lane (2013)         | 5           | NA:Opinion paper |                        |                      | Improved reading abilities            | Increased reading motivation & confidence                                                          |
| 28     | Pillow-Price (2014) | 5           | NA:Opinion paper |                        |                      | Improved reading abilities            | Increased reading: confidence, self-esteem. Reduced reading anxiety                                |
| 29     | Shannon (2007)      | 5           | 51:Survey        | Guardians of 8 yr-olds |                      |                                       | Increased reading motivation and confidence                                                        |
| 30     | Shaw (2013)         | 5           | NA:Opinion paper |                        |                      | Improved reading abilities            | Increased intrinsic reading motivation, increased reading engagement                               |
| 31     | Siegel (2004)       | 5           | NA:Opinion paper |                        |                      | Improved reading abilities            | Increased reading confidence, reduced reading anxiety                                              |
| 32     | Snider (2007)       | 5           | NA:Opinion paper |                        |                      | Improved reading ability              | Improved reading confidence                                                                        |
| 33     | Truett (2014)       | 5           | NA:Opinion paper |                        |                      |                                       | Increased reading confidence, reduced reading anxiety                                              |
| 34     | U Tenn Vet (2015)   | 5           | NA:Opinion paper |                        |                      |                                       | Increased reading motivation                                                                       |
| 35     | Friesen (2009)      | 5           | NA:Opinion paper |                        |                      |                                       | Importance of multi-sensory experiences. Improved emotional, social & behavioural effects          |

(Continued)

Table 2. (Continued)

| RefNo. | First Author (year)          | CEBM Rating | N:Type                    | Participant Age                 | Developmental Status                                | Effects on Reading Skills                                                                       | Effects on Reading Behaviours                                                                      |
|--------|------------------------------|-------------|---------------------------|---------------------------------|-----------------------------------------------------|-------------------------------------------------------------------------------------------------|----------------------------------------------------------------------------------------------------|
| 36     | Friesen (2010)               | 5           | NA:Opinion paper          |                                 |                                                     |                                                                                                 | Increased feelings of social and emotional support                                                 |
| 37     | Friesen (2012)               | 5           | NA:Opinion paper          |                                 |                                                     | Improved reading abilities                                                                      |                                                                                                    |
| 38     | Jalongo (2004)               | 5           | NA:Opinion paper          |                                 |                                                     | Improved reading abilities                                                                      |                                                                                                    |
| 39     | Black                        | 5           | NA:Opinion paper          |                                 |                                                     | Reading rate improved by 24 words/minute                                                        |                                                                                                    |
| 40     | Konarski (no date)           | 5           | 1:Case study              | 6 years                         | Autistic                                            | Improved oral reading fluency (by 3 sounds) and non-sense word fluency (by 4 sounds)            | Improved recreational and academic reading attitude                                                |
| 41     | Gallatin (2014)              | 5           | 4:Interview & 13:Survey   | Teachers of children 7–11 years | Reading disability and typically developing readers |                                                                                                 | Improved confidence and motivation to read                                                         |
| 42     | Fisher (2014)                | 5           | 1                         | 9 years                         | Disengaged reader                                   | Improved reading accuracy and reading comprehension on Neale Analysis of Reading Ability        |                                                                                                    |
| 43     | Grigore (2014)               | 4           | 3                         | 7–8 years                       | Autistic                                            |                                                                                                 | Increased social initiations from the children                                                     |
| 44     | Heyer (2007)                 | 4           | 6:Intervention 0:Control  | Grades 2–4(7–9 years)           | Below average                                       | Slightly increased reading abilities                                                            | Increased confidence and love for reading                                                          |
| 45     | Intermountain Therapy (2009) | 4           | 12:Intervention 0:Control | Not recorded                    | Struggling readers                                  | 11/12 participants improved up to 4 reading grades                                              |                                                                                                    |
| 46     | Kaymen (2005)                | 4           | 4:Intervention 0:Control  | Grade 3 teachers (8 years)      | Not recorded                                        |                                                                                                 | Improved attitude                                                                                  |
| 47     | Lloyd (2014)                 | 4           | 11:Intervention 0:Control | 5–11 years                      | At risk readers                                     | Improved reading grades                                                                         | Improved attitudes, increased confidence, co-operation & attendance                                |
| 48     | Newlin (2003)                | 4           | 15:Intervention 0:Control | Grade 2 (7 years)               | Below average readers                               | Improved reading ability by minimum of two grades                                               |                                                                                                    |
| 49     | Walsh                        | 4           | 5: Intervention 0:Control | 6–7 years                       | Reading disabilities                                | Improved reading fluency (visual inspection)                                                    | Increased reading confidence and engagement                                                        |
| 50     | Griess                       | 4           | 4: Intervention 0:Control | Grades 3–5 (8–10 years)         | Learning disabilities                               | Spent more time reading                                                                         | Improved reading motivation & enjoyment for reading                                                |
| 51     | Smith (2010)                 | 4           | 11:Intervention 0:Control | 6–12 years                      | Home schooled                                       | Reading fluency improved by 30%                                                                 |                                                                                                    |
| 52     | Martin                       | 4           | 10:Intervention 0:Control | 5–9 years                       | Not recorded                                        | Improved scores on Test of Reading Comprehension (TORC) and Measures of Academic Progress (MAP) |                                                                                                    |
| 53     | Bassette (2013)              | 4           | 3                         | 7–11 years                      | Emotional/ behavioural disabilities                 |                                                                                                 | Increased on-task behaviours during reading: Behavioural Observation of Students in Schools (BOSS) |

(Continued)

Table 2. (Continued)

| RefNo. | First Author (year) | CEBM Rating | N:Type                               | Participant Age                  | Developmental Status  | Effects on Reading Skills                                                     | Effects on Reading Behaviours                                |
|--------|---------------------|-------------|--------------------------------------|----------------------------------|-----------------------|-------------------------------------------------------------------------------|--------------------------------------------------------------|
| 54     | Moore (2013)        | 4           | 71:Repeated Measures                 | Grade 3 (8 years)                | Not recorded          |                                                                               | Changed implicit theories of human reading ability           |
| 55     | Paradise (2007)     | 4           | 98:Intervention<br>19:Control        | Grades 1–5 (6–10 years) Teachers | Not recorded          | Improved identifying, exploring, defining, analysing, predicting, summarising | Improved reading: attitude, enthusiasm & self-esteem         |
| 56     | Booten (2011)       | 2c          | 17:Intervention<br>15:Control        | Grade 5 (10 years)               | Not recorded          | No significant differences                                                    | No significant differences                                   |
| 57     | Lenihan (no date)   | 2c          | 9:Intervention<br>9:Control          | Grade 2 (7 years)                | Not recorded          | Reading abilities declined more in control group                              | Reading attitude decreased more in control group             |
| 58     | Peterson (2008)     | 2c          | 29:Intervention<br>26:Control        | Grade 7 (12–13 years)            | Not recorded          | No significant differences                                                    |                                                              |
| 59     | Smith (2009)        | 2c          | 152: Intervention<br>98:Control      | Grade 2 (7 years)                | Low income families   | Improved reading fluency                                                      |                                                              |
| 60     | Treat (2013)        | 2c          | 9:Intervention<br>8:Control          | Grades 2–5 (7–10years)           | Learning disabilities | Improved reading fluency, accuracy and comprehension                          | Improved reading self-perception and reduced reading anxiety |
| 61     | Wohlfarth (2014)    | 2c          | 12:Repeated-measures                 | 6–7 years                        | German speaking       | Improved: Correct words, punctuation & comprehension—recordings of reading    |                                                              |
| 62     | Friedmann (1983)    | 2c          | 38:Repeated measures                 | 9–5 years                        | Not recorded          |                                                                               | Blood pressures were lower when reading to a dog             |
| 63     | LeRoux (2014)       | 2b          | 27:Dog 24: Adult 26:Teddy 25:Control | 7–13 years                       | Poor readers          | Improved reading accuracy and reading comprehension in dog group              |                                                              |

doi:10.1371/journal.pone.0149759.t002

population [46]. These case studies reported improved reading abilities when reading to a dog, as measured by teacher opinion or reading grade [44, 45, 47, 48]. Alterations to reading behaviours were also documented, including, improved reading confidence [44, 47], greater attention when reading, improved attendance to reading lessons [47], more positive attitude to reading [46] and increased social initiations when reading [43].

Five of the 13 papers classified as Level 4 evidence used standard tests to measure the effects of reading to a dog on a case series group of children, but did not include control conditions. The tests used included, the AIMSweb Curriculum Based Measurement [49], the Informal Reading Inventory [50], the Grey Oral Reading Test [51], the Test of Reading Comprehension and Measures of Academic Progress [52] and the Behavioural Observation of Students in School [53]. Three of the studies measured the effects of reading to a dog on a-typically developing children, with reading disabilities [49], learning disabilities [50], or emotional and behavioural problems [53]. The studies reported that reading to a dog has a positive effect on reading abilities, improving reading fluency [49, 51] and enhancing reading comprehension [52]. Evidence of positive alterations to behavioural processes were also documented, including, improved reading motivation [50], reading confidence [49], reading attitude and enjoyment [49–51] and increased engagement and on-task behaviours [49, 53].



**Table 3. Evidence for the Value of Children Reading to Dogs (continued).**

| RefNo. | First Author (year)          | Reading Measure                                                                                                              | Behavioural Measure                       | Intervention (if applicable)         | Length of Intervention | Duration of Sessions                    |
|--------|------------------------------|------------------------------------------------------------------------------------------------------------------------------|-------------------------------------------|--------------------------------------|------------------------|-----------------------------------------|
| 17     | Bueche (2003)                |                                                                                                                              |                                           | R.E.A.D                              | Not recorded           | Not recorded                            |
| 18     | Burns (2014)                 |                                                                                                                              |                                           | R.E.A.D                              | Not recorded           | Not recorded                            |
| 19     | Dunlap (2010)                |                                                                                                                              |                                           |                                      | Not recorded           | Not recorded                            |
| 20     | Faver (2009)                 |                                                                                                                              |                                           |                                      | Not recorded           | Not recorded                            |
| 21     | Francis (2009)               |                                                                                                                              |                                           | Library Therapy Dog                  |                        | One per week                            |
| 22     | Hughes (2002)                |                                                                                                                              |                                           |                                      | Not recorded           | Not recorded                            |
| 23     | Inklebarger (2014)           |                                                                                                                              |                                           |                                      | Not recorded           | Not recorded                            |
| 24     | Jalongo (2005)               |                                                                                                                              |                                           | R.E.A.D                              | Not recorded           | Not recorded                            |
| 25     | Kennel Club (2011)           |                                                                                                                              |                                           | Bark&Read                            |                        |                                         |
| 26     | Klotz (2014)                 |                                                                                                                              |                                           | R.E.A.D                              | Not recorded           | Not recorded                            |
| 27     | Lane (2013)                  |                                                                                                                              |                                           | Canine Assisted Reading Programmes   | Not recorded           | Not recorded                            |
| 28     | Pillow-Price (2014)          |                                                                                                                              |                                           | SitStay&Read                         | Not recorded           | Not recorded                            |
| 29     | Shannon (2007)               |                                                                                                                              |                                           | Library Dog                          | Not recorded           | Not recorded                            |
| 30     | Shaw (2013)                  |                                                                                                                              |                                           | R.E.A.D                              | Not recorded           | 20–30 minutes                           |
| 31     | Siegel (2004)                |                                                                                                                              |                                           |                                      | Not recorded           | Not recorded                            |
| 32     | Snider (2007)                |                                                                                                                              |                                           |                                      | Not recorded           | Not recorded                            |
| 33     | Truett (2014)                |                                                                                                                              |                                           | Paws for Reading                     | Not recorded           | Not recorded                            |
| 34     | U Tenn Vet (2015)            |                                                                                                                              |                                           | Ruff Reading                         | Not recorded           | Once per week                           |
| 35     | Friesen (2009)               |                                                                                                                              |                                           |                                      | Not recorded           | Not recorded                            |
| 36     | Friesen (2010)               |                                                                                                                              |                                           |                                      | Not recorded           | Not recorded                            |
| 37     | Friesen (2012)               |                                                                                                                              |                                           | R.E.A.D                              | Not recorded           | Not recorded                            |
| 38     | Jalongo (2004)               |                                                                                                                              |                                           | R.E.A.D                              | Not recorded           | Not recorded                            |
| 39     | Black                        |                                                                                                                              |                                           | R.E.A.D                              | Not recorded           | Not recorded                            |
| 40     | Konarski (no date)           | Oral Reading Fluency (ORF), Nonsense Word Reading Fluency (NWF) & Dynamic Indicators of Basic Early Literacy Skills (DIBELS) | Elementary Reading Attitudes Scale (ERAS) |                                      | 5 weeks                | Not recorded                            |
| 41     | Gallatin (2014)              | Teacher report                                                                                                               | Measure of Academic Progress Assessment   | R.E.A.D                              | Teacher report         | Measure of Academic Progress Assessment |
| 42     | Fisher (2014)                | Neale Analysis of Reading Ability                                                                                            |                                           | Classroom Canines                    | 8 weeks                | 1 hour (4 students: 15 mins reading)    |
| 43     | Grigore (2014)               |                                                                                                                              |                                           |                                      | 15 minutes             | 6 sessions per condition                |
| 44     | Heyer (2007)                 |                                                                                                                              |                                           | R.E.A.D                              | 16 weeks               | 20 minutes                              |
| 45     | Intermountain Therapy (2009) |                                                                                                                              |                                           | R.E.A.D                              | 8 weeks                | 20 minutes                              |
| 46     | Kaymen (2005)                |                                                                                                                              |                                           | SHARE a book                         | Not recorded           | Not recorded                            |
| 47     | Lloyd (2014)                 |                                                                                                                              |                                           | Classroom Canine                     | 18 weeks               | Not recorded                            |
| 48     | Newlin (2003)                |                                                                                                                              |                                           | Carolina Canines for Service Project | 1 academic year        | 20 minutes                              |

(Continued)

Table 3. (Continued)

| RefNo. | First Author (year) | Reading Measure                                                              | Behavioural Measure                                    | Intervention (if applicable) | Length of Intervention      | Duration of Sessions |
|--------|---------------------|------------------------------------------------------------------------------|--------------------------------------------------------|------------------------------|-----------------------------|----------------------|
| 49     | Walsh (2014)        |                                                                              |                                                        |                              | 10 minutes (3 times/week)   | 6 weeks              |
| 50     | Griess (2010)       | Informal Reading Inventory                                                   |                                                        |                              | 13 weeks (2 weeks holidays) | 20 minutes           |
| 51     | Smith (2010)        | Dynamic Indicators of Basic Early Literacy Skills (DIBELS)                   |                                                        | Sit,Stay&Read                | 8 weeks                     | 1 hour (shared)      |
| 52     | Martin (2001)       | Test of Reading Comprehension (TORC) and Measures of Academic Progress (MAP) |                                                        | R.E.A.D                      | 15 months                   | 20 minutes           |
| 53     | Bassette (2013)     |                                                                              | Behavioural Observation of Students in Schools (BOSS)  |                              | 4 weeks                     | 30 minutes           |
| 54     | Moore (2013)        |                                                                              |                                                        |                              | 16 weeks                    | 45 minutes (group)   |
| 55     | Paradise (2007)     |                                                                              |                                                        | Canine Assisted Reading      |                             | 30 minutes           |
| 56     | Booten (2011)       | Pearson-Scott Foreman                                                        | Respect & Protect (School behavioural management plan) |                              | Not recorded                | 3 days/week in class |
| 57     | Lenihan (no date)   | Curriculum Based Measurement (CBM)                                           | Elementary Reading Attitudes Scale (ERAS),             | R.E.A.D                      | 5 weeks                     | 30 minutes           |
| 58     | Peterson (2008)     | Degrees of Reading Power (DRP)                                               |                                                        |                              | 5 days                      | 20 minutes           |
| 59     | Smith (2009)        | Dynamic Indicators of Basic Early Literacy Skills (DIBELS)                   |                                                        | Sit,Stay&Read                | 8 weeks                     | 1 hour (shared)      |
| 60     | Treat (2013)        | Grey Oral Reading Test (GORT) & Basic Reading Inventory (BRI)                | No standardised (own scales)                           |                              | 10 sessions                 | 10–15 minutes        |
| 61     | Wohlfarth (2014)    | Audiotaped. Scoring protocol designed                                        |                                                        |                              | Not recorded                | Not recorded         |
| 62     | Friedmann (1983)    |                                                                              | Blood Pressure                                         |                              | Not recorded                | Not recorded         |
| 63     | LeRoux (2014)       | Neale Analysis of Reading Ability                                            |                                                        |                              | 10 weeks                    | 20 minutes           |

doi:10.1371/journal.pone.0149759.t003

Two of the 13 papers classified as Level 4 evidence implemented control procedures, in terms of using a repeated measures design [54], and a control group condition [55], but did not use standard measures to assess the effects of reading to a dog. The first of these papers reported that after reading to a dog children changed their implicit theories of reading ability, which may lead to a positive attitude to reading lessons [54]. The second paper reported that children who read to a dog improved on specific reading skills, including the ability to identify, explore, define, analyse, predict and summarise when reading, in comparison to a group of children who did not read to a dog [55].

The studies classified as Level 4 evidence support the conclusions made based on the Level 5 evidence; reading to a dog may enhance a child’s reading environment, by increasing reading motivation and confidence, reducing anxiety, increasing task engagement and reading attitude. There is some evidence to suggest that after children take part in a reading to a dog programme they improve their scores on reading tests; however, such conclusions need to be assessed in relation to appropriate control conditions for this to be taken with a degree of confidence.

## OCEBM Classification Level 2c

Level 2c evidence is “Outcomes research”. The search documents have been classified as Level 2c evidence if they clearly state the outcome of reading to a dog, using standard tests and in relation to a control group or condition, using consistently applied reference standards (without which the data would be classified as Level 3b). No evidence was classified as Level 3a, because no systematic reviews were identified.

Seven papers (15%) were classified as Level 2c evidence for the effects of children reading to dogs. All of the papers used a standard or objective approach to measure the effects of reading to a dog. None of the papers reported effect sizes and some failed to report either descriptive or inferential statistics. Five of these seven papers assessed the effects of reading to a dog in comparison to a control group [56–60]. One of the five papers assessed the effects of reading to a dog with children with learning disabilities [60]; the remaining four did not specify the developmental status of their population. Two of the five papers that used a control group comparison found no significant effects of reading to a dog on performance on the Degrees of Reading Power test [58] and a Pearson-Scott Foreman reading test [56]. However, the first mentioned study only assessed reading ability after taking part in a five-day intervention [58], and the other failed to record the duration of the intervention [56].

Two of the five papers reported a statistically significant increase in reading abilities as measured by the Dynamic Indicators of Basic Early Literacy Skills [59] and Grey Oral Reading Test [60] in children who took part in a reading to a dog programme. Only one of these studies included the reading performance of the control group in the statistical analysis, and used a co-variate analysis to control for reading performance at baseline [59]. This study reported that the end of program totals for oral reading fluency, after being adjusted for baseline performance were 78.38 (mean reading fluency) for the intervention group and 71.04 for the control group. The authors do not state whether these are high or low scores on this test.

The second study referred to conducted a t-test analysis of pre and post intervention reading ability separately for the intervention and control group [60]. This study reported an increase in mean reading performance on the GORT for the intervention group (reading rate increase of: 1.78 (Pre-test:  $5.44 \pm 2.18$ ; Post-test:  $7.22 \pm 2.33$ ;  $p = 0.007$ ), reading accuracy increase of: 3.34 (Pre-test:  $5.66 \pm 1.80$ ; Post-test:  $9.0 \pm 1.58$ ;  $p = 0.001$ ), reading fluency increase of: 2.88 (Pre-test:  $5.0 \pm 1.87$ ; Post-test:  $7.88 \pm 2.08$ ,  $p = 0.002$ ), reading comprehension increase of: 1.89 (Pre-test:  $7.44 \pm 1.59$ ; Post-test:  $9.33 \pm 1.32$ ,  $p = 0.000$ ), oral reading quotient increase of: 14.16 (Pre-test:  $77.5 \pm 10.46$ ; Post-test:  $91.66 \pm 9.22$ ,  $p = 0.001$ ); NB: Descriptive statistics on ranges were not presented in the paper). However, mean figures were not provided for the control group, therefore, even a visual inspection of differences between the control and intervention group cannot be made. Furthermore, without the use of case matching it is important that appropriate statistical techniques are employed to control for differences in reading levels at baseline between intervention and control groups.

One study assessed the effects of reading to a dog over school summer vacation. This small pilot study found no statically significant differences as a result of the programme, however this could be due to the small sample size (9 children in the intervention group and 9 children in the control group). Indeed, the authors observed that children in the control group (who read to a human alone) showed trends to reduced reading ability and poorer reading attitudes over the summer vacation, than children who were reading to a dog. No effect sizes or mean values were reported to support this statement, although visual inspection of the graphed data indicates that the control group showed a reduction in reading ability (words per minute) that was double that shown by the intervention group. The authors also noted that no children

dropped out of the intervention group, but attendance was reduced over time in the control group [57].

The final two out of the seven papers classified at Level 2c used a repeated measures design to assess the effects of reading to a dog. One paper reported the effects of 12 children reading to a dog, in comparison to reading to a human alone, using repeated measures, cross over design [61]. They report a clear documentation of how they assessed reading ability, despite not using a standardised reading test. They observed that when children read to a dog they performed better on tasks including word recognition (Dog:  $96.45 \pm 0.79$ ; Mean  $\pm$  SD, Control:  $94.83 \pm 1.67$ ) recognitions of punctuation marks (Dog:  $82.84 \pm 7.60$ ; Control:  $70.73 \pm 8.76$ ), and use of line breaks (Dog:  $79.66 \pm 4.50$ ; Control:  $71.93 \pm 7.97$ ). These improvements were not statistically significant.

The second paper which used repeated measures, cross over design measured physiological responses (blood pressure) of 38 children when they were with a dog and engaging in reading and when they were resting, and when they were not with a dog and reading and resting [62]. The presence of the dog reduced blood pressure when the children were reading and when they were resting. Although the study did not assess what effect this change in anxiety had on reading performance, it does represent the first study to apply objective, physiological, measures to assess the effects of reading to a dog on child anxiety levels.

These studies, classified at Level 2c, support the conclusions drawn from Level 5 and Level 4 evidence. Reading to dogs may bring about changes to children's behavioural processes, which has a positive impact on the environment in which reading is practiced and in turn facilitates reading performance.

## OCEBM Classification Level 2b

Level 2b evidence includes "Individual cohort studies, including low quality randomised control trials."

One paper (2%) returned from the search procedures was classified as Level 2b evidence. Le Roux et al. [63] randomly assigned 102 third grade students from one school, who were identified as poor readers, to one of four conditions. The study does not document whether any statistical procedures were used to calculate the required sample size, and instead appears to be based on a convenience based sampling of the population. Twenty-seven students read to a dog (through Pets as Therapy teams), 24 read to an adult, 26 read to a teddy bear with an adult and 25 students were in a control group that did not include a reading intervention. Reading ability was measured using the Neale Analysis of Reading Ability at baseline (Time 1), after the 10-week programme (Time 2) and eight weeks later (Time 3). The intervention ran for 10 weeks and each session lasted for 20 minutes. The authors state that there was no significant difference between reading abilities of the four groups at baseline, but no inferential or descriptive statistics are reported to support this statement, nor were appropriate statistical techniques employed to control for differences between the populations. Indeed, visual inspection of their figures (p665) shows that reading comprehension was higher in the dog group than the other groups at baseline [63]. No significant effects of group were reported between the time points. However, over all time points reading rate was significantly better in the dog group ( $7.94 \pm 0.96$ ) compared to the teddy bear group ( $7.45 \pm 0.79$ ) with a medium effect size reported ( $\eta^2 = 0.09$ ). Both reading accuracy and reading comprehension were better in the dog group (reading accuracy:  $7.73 \pm 1.13$ ; reading comprehension:  $7.29 \pm 0.13$ ) compared to the adult group, teddy bear group (reading accuracy:  $7.21 \pm 0.78$ ; reading comprehension:  $6.59 \pm 0.80$ ) and control group (reading accuracy:  $7.28 \pm 0.77$ ; reading comprehension:  $6.74 \pm 0.83$ ) with large effect sizes (reading accuracy:  $\eta^2 = 0.13$ ; reading comprehension:  $\eta^2 =$

0.15) Demographic information for each student was collected, but not reported in the paper. It is important that studies report demographic information to evaluate to whom reading to dogs may be most beneficial for. This study shows promise for reading to dog programmes for struggling readers, but does not consider the potential mechanisms involved in this process.

## Discussion

In this discussion we first consider to what extent the existing evidence base, reported in this review paper, supports the pedagogical value of reading to dogs. We also discuss potential mechanisms that may be involved when reading to a dog. We draw upon the literature presented here as well as including broader literature from the animal-assisted intervention (AAI) field, to suggest how reading to a dog may affect reading performance.

The 48 studies that met the search criteria described positive effects of children reading to dogs. In particular, the papers evidenced improvements to the children's behavioural processes, which may improve the environment in which reading is practiced, and therefore lead to better reading performance. However, the quality of the evidence on which these conclusions are drawn is low, with the majority categorised at the lowest level (Level 5) on the OCEBM criteria [15]. Much of the evidence is based on ad-hoc reports that have not been through a peer-review process. Conclusions are typically based on inferences from small sample sizes. Additionally, studies do not use blind scoring, fail to consider longitudinal durability of the changes observed, do not sufficiently control for baseline scores or appropriately randomly allocate children to intervention or control groups. Only one report claims to have conducted a randomised control trial [63], but given the relatively small sample size in each group, the quality of evidence remains low.

It is clear that future research in this area should prioritise using standardised measures to assess the effects of reading to a dog. Few studies use measures that have clear documentation of their validity and reliability, indeed few studies even use standard measures as used in educational practice, and instead rely on subjective judgements, such as teacher opinion. Furthermore, no studies use standardised scales to assess the relationship between reading performance and behavioural processes, which is important to help understand how reading to a dog programme may benefit children. Such an evaluation would also help us to identify which children may be most likely to benefit from taking part in these programmes and therefore lead to the development of clinically and economically effective practices. In a similar light, in order to develop codes of conduct of best practice and a reading to dog's curriculum it is essential that future reports and scientific investigations document details of the intervention, including the number of sessions, duration of the sessions, details of the dog(s) and demographic variables of the children (e.g. age, disability status, and experience with dogs).

Despite the criticisms that can be levelled at the existing evidence base, there is clear documentation that reading to a dog has the potential to bring significant improvements to children's reading abilities, and therefore deserves further investigation. Based on figures provided by informal communications with registered school dog organisations, a trained dog and handler can assist a child to read for one year for around £60 (GBP). If volunteer handlers are involved, as is often the case, this figure reduces to around £16 (GBP). When considering the current global costs of illiteracy [1, 2], reading to dog's programs may represent a unique, cost effect strategy which could be implemented into a broader reading curriculum. However, before the practice of reading to dogs is adopted into mainstream education it is vital that the practice is subject to greater scientific scrutiny in order to evaluate how these programmes may benefit children, and if these gains are of clinical significance. Such evaluations are also important in developing specific reading curricula. Much of the current practice in reading to dogs

occurs without specific guidelines, or evidence of documented lesson plans. For educators and policy makers to recognise the value of reading to dog's programmes it is important that curricula are developed which have clear and measurable learning goals.

## How might Reading to Dogs Improve Reading Abilities?

Many of the papers listed in this review make reference to students demonstrating a change in behavioural processes during reading to dog's programmes (Table 2). Such a change is taken as an indication that reading to dogs may improve the wider learning environment for children, which may improve reading performance. In Fig 2 we provide a graphical description as to how reading to a dog may influence behavioural processes, enhancing the learning environment and ultimately leading to improved reading performance.

The processes which are outlined in Fig 2 are evidenced in the wider field of human-animal interactions as being processes which can change in the presence of an animal.

**Top-down processes.** There is evidence to suggest that animal-assisted therapy (AAT) with children with Autism Spectrum Disorder (ASD) produces increased displays of positive attitudes and feelings, as evidenced by increased smiling and laughing [82, 83] and decreased problematic behaviours [83]. Similar improvements have been observed in classroom situation [84], which has led some to suggest that a classroom dog may improve a child's attitude to school [85]. However, these classroom studies, like the reading to dog's studies are based on small-scale subjective observations and do not include a control group. Gee and colleagues have conducted a series of controlled laboratory-based investigations to explore the impact of the presence of a dog on a range of children's cognitive and motor tasks [86–90]. These studies found that with a dog, compared to without a dog, young children perform motor tasks faster without sacrificing accuracy [86], require less assistance with a memory task, potentially demonstrating improved concentration [87], require fewer instructional prompts to complete imitation tasks [88], show fewer errors on a cognitive task [89], and show improved object recognition [90]. These studies imply that a dog may improve the motivation of children to engage and accurately complete set tasks.

**Confidence.** McConnell et al. [91] provide one of the most recent studies to suggest that animals can improve confidence (defined here as including the constructs of self-esteem and self-concept); with adult pet owners scoring higher on Rosenberg's [92] scale of self-esteem than non-pet owners. However, it is difficult to determine a causal effect, in that people self-select for pet ownership status so it is possible that people with high self-esteem may be more likely to choose to own a pet, rather than pet ownership increasing low self-esteem. There appears to be little research that has explored how pet dogs may affect child confidence, yet this could prove to be an important mechanism in determining how dogs may benefit children's educational achievement. Nonetheless, one study of 130 adolescents showed that those who owned a pet have greater self-esteem than those who did not [93], but again, it is difficult to infer causation. Only a single conference paper shows a possible causal effect of the dog over time (as opposed to population selection bias) with the addition of a classroom pet improving self-esteem in children over a nine-month period in comparison to a control group [94].

**Anxiety.** The moderating effects of dogs on human anxiety and stress are a re-occurring theme in AAT literature [95–97]. Although ad-hoc reports indicate that anxiety reducing effects are observed in the context of classroom dogs to date there is insufficient evidence of appropriate quality to support this claim, but neither is there evidence to deny it. Evidence from physiological indicators of anxiety have the advantage of being free from experimenter bias, but often relate to general arousal rather than a specific state and show a lack of consensus as to whether dogs have an excitatory effect, a calming effect, or no effect. For instance,

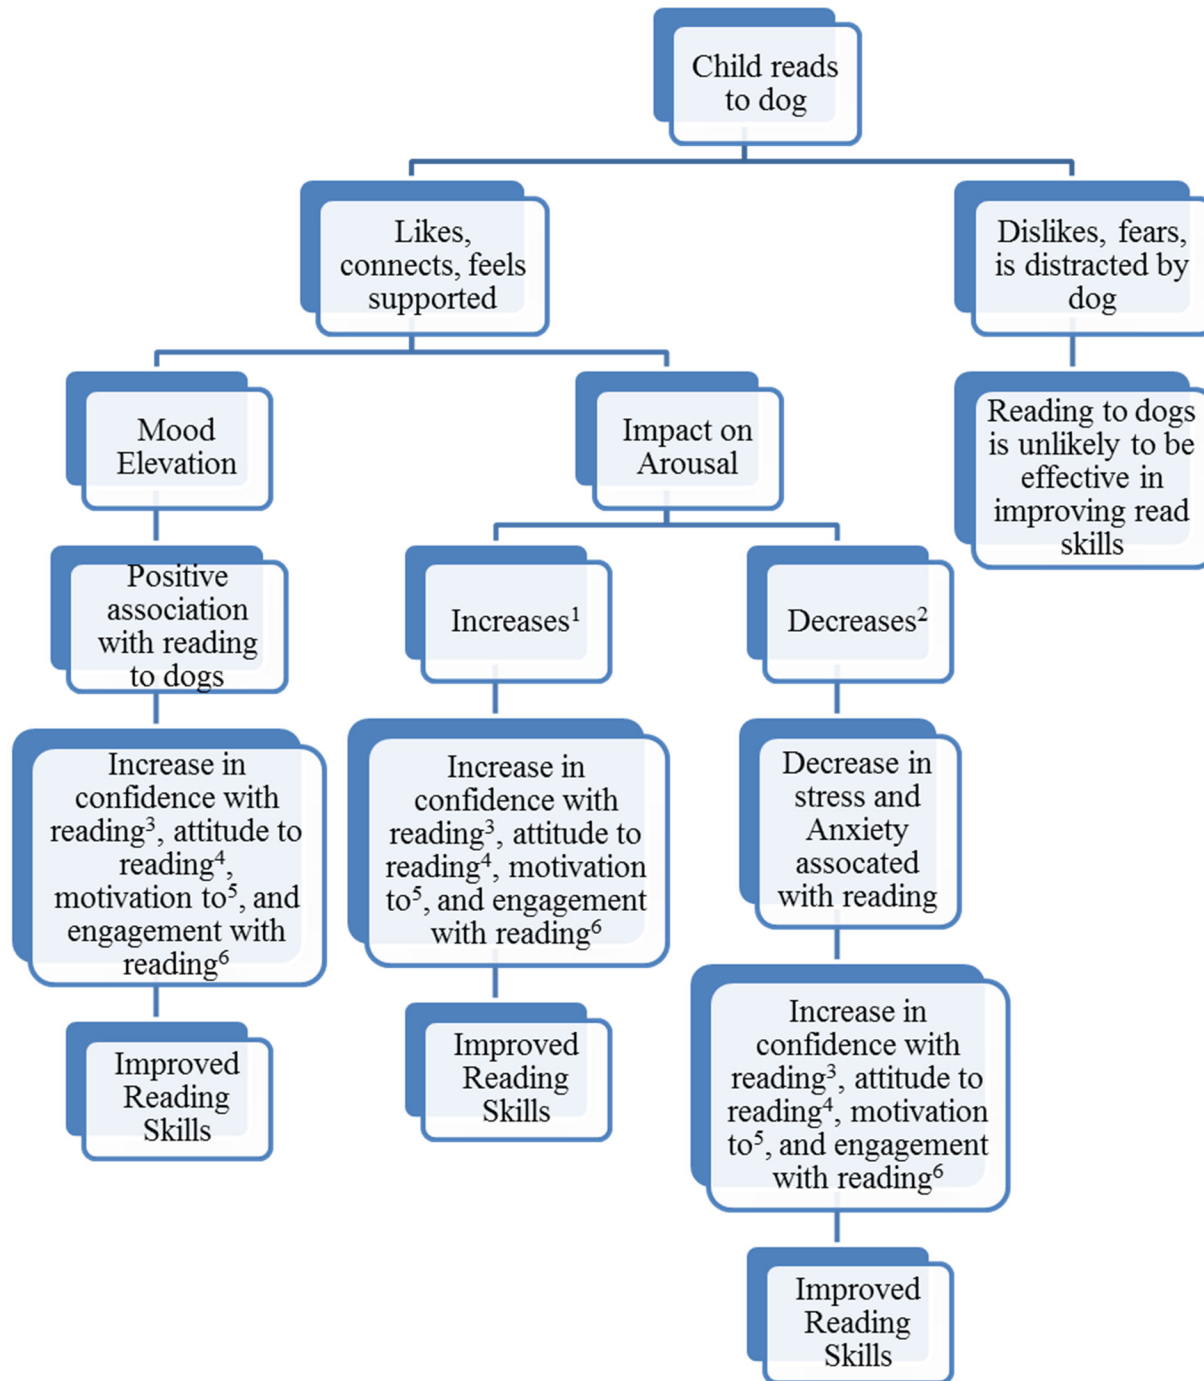

**Fig 2. An Illustration of how Reading to a Dog may Influence Reading Performance.** <sup>1</sup>Increased arousal can heighten cognitive performance on some tasks [64, 65]. Whether increased or decreased arousal results in optimal performance is typically determined by the individual and the nature of the task (see Individual Zone of Optimal Functioning) [66, 67] <sup>2</sup>Reading anxiety (over-arousal) can impair children's reading performance in the classroom [12] by negatively impacting on cognitive processes involved in reading, including problem-solving and self-regulation [68, 69]. <sup>3</sup>A reader's self-concept or confidence in their reading ability determines reading practices [70], by influencing the amount of time and the degree of effort which is put into reading [71]. There is a positive relationship between reading self-concept and reading achievement [72, 73]. The dynamics of the relationship between self-concept and achievement is still debated it is thought to be reciprocal, with greater achievement raising student's self-concept, as well as higher self-concept leading to improved academic achievements [74]. <sup>4</sup>There is an association between reading attitudes and reading performance in children, with those who have a positive attitude doing better in reading tests than those who have a negative attitude [75, 76]. Attitudes towards reading are thought to influence attainment by determining reading behaviours (e.g. frequency of reading) [70]. <sup>5</sup>In reading studies motivation is often discussed in terms of intrinsic motivation (motivated from within; e.g., curiosity to read, enjoyment of the experience) and extrinsic (motivated by external factors; e.g., to get a good grade) [77, 78].

Although both factors are thought to play a role in influencing reading behaviours, intrinsic motivation is thought to be the key determiner [78–80].

<sup>6</sup>Engagement in reading is often associated with motivation. According to Guthrie and Wigfield [81] reading motivation is an interaction with text that is both motivated and strategic, engaged reading is related to reading comprehension success, and engaged reading can be improved by instructional practices that use motivational and cognitive strategies.

doi:10.1371/journal.pone.0149759.g002

Somervill et al. [98] reported a significant increase in the blood pressure and heart rate of 17 children diagnosed with attention-deficit hyperactivity disorder (ADHD) after handling a dog. It is noted that the authors did not include a familiarisation period with the dog, indeed the child only spent one five-minute session with the dog, and the child was not given a structured task to do to focus their attention. Other studies suggest that the presence of a dog may reduce physiological parameters of stress, decreasing blood pressure when reading to a dog [62] and reducing cortisol awakening in children with insecure attachment [99] and with autism [100]. These effects were observed in comparison to a control condition. A recent study showed that physical contact with a dog during a stressful working memory task did not significantly alter the heart-rate variability of undergraduate students in comparison to contact with a stuffed toy or another human [101], suggesting that dogs do not reliably influence humans' physiological stress responses. It is noted that this study used adult rather than child participants which leaves open the possibility that dogs may be more effective at reducing child, compared to adult, physiological reactions. A further possibility is that dogs only reduce physiological arousal in a specific population. Comparisons of children's skin conductivity responses showed that the presence of a dog reduced arousal in children with ASD, but increased arousal in typically developing children in one study [102]. It is clear that further research is needed to establish whether children's reading to dogs modulates physiological measures of arousal in general or anxiety specifically, and whether decreases (e.g. a calming effect) or increases (e.g. heightened arousal and attention) are most conducive to the learning environment.

**Social Support.** The social support hypothesis is often mentioned in the study of animal companionship, with evidence suggesting that animals offer social support themselves, as well as acting as 'social lubricants' to facilitate interactions with other humans [81, 91, 103–105]. Indeed, ad-hoc reports suggest that the non-threatening, non-judgemental presence of a dog improves children's feelings of support during reading [24]. Although the influence of dogs on young children's perception of social support is largely under-explored, Beetz et al. [99] reported that children, aged 7–11 years, experience greater levels of support in a stressful social situation in the presence of a dog than a friendly human. Further research is needed to investigate these effects in educational environments.

**Engagement.** The notion of animals affecting our attention and engagement is related to the commonly cited biophilia hypothesis in animal companionship research. This states that humans have developed to attend to living systems, including animals, due to an innate drive to be close to other living things, perhaps for safety and/or because of the positive feelings associated with learning about the living world [106, 107]. Evidence to support this is observed in studies which show that adults show faster identification of visual changes to scenes that contain animals or humans than those that contain inanimate objects, when controlling for dynamicity of the scenes [108]. More specifically, a study has shown that children preferred to interact with, and showed greater attention to, animals in comparison to stimulating toys [109]. Additional evidence supporting the effect of dogs to improve a child's attention and engagement comes from a clinical study highlighting a reduction in problematic attention/deficit-hyperactivity symptoms in children diagnosed with attention/deficit-hyperactivity disorder (AD/HD) when participating in a canine-assisted intervention [110]. The studies reported by Gee and colleagues provide some evidence to suggest that dogs may help typically developing



children to engage in structured tasks, similar to that required in classroom lessons [86–89]. However, children's willingness to respond to animals, or desire to be close to them, is likely to be mediated by individual differences and life experiences as well as an innate drive. Those individuals with less positive perceptions or experiences with animals are less likely to show improvements through animal interactions [111, 112]. Given the frequent negative portrayals of animals in the media (e.g. regarding dog bites) the effect of negative experience may be a more important issue that warrants careful consideration in both practice and experimental design.

In summary, the evidence suggests that reading to a dog has a positive impact on the learning environment in which reading is practiced. However, based on our classifications using the OCEBM the quality of this evidence is poor. We recognise that despite using an objective classification system we cannot rule out bias in our judgement when assigning classifications. With the aim of reducing this potential bias all members of the team met to discuss classifications. Additionally, we sought independent opinions from two additional research professionals; no discrepancies occurred. We are unable to provide effect sizes for the majority of the results discussed in this paper, due to poor design and reporting procedures. For this reason, and because of the lack of Randomised Control Trials (RCTs) identified through the searches, it was not possible or relevant to conduct a meta-analysis on the data. As well as representing a critique point for this systematic review it highlights the current state of the art, with need for greater scientific rigour in this field. Nonetheless, there is some evidence from wider HAI field to support the conclusion. Drawing upon the wider field provides some convergent validity for the practice of reading to dogs, but the conclusions should still be interpreted with caution. Although outside of the scope of this paper, much of the existing HAI research can also be subject to a number of criticisms. These problems further highlight the need for future studies in this field to include rigorous controls and high quality scientific designs such as large scale randomised control trials in order to systematically explore, and understand, the impact of HAI.

## Summary and Conclusion

This paper presents the first systematic review exploring the value of HAI in educational practice, specifically the practice of reading to dogs. The review highlights the plausibility of reading to dogs to bring improvements to children's reading abilities and beneficially alter behavioural and emotional processes which may be important aspects in creating a learning environment to best cultivate reading skills.

However, there is a clear need for more rigorous investigation in this area. Large scale randomised control trials, with longitudinal examinations of effects are needed to improve the quality of the evidence base of the research and to further our theoretical understanding of the underlying mechanisms impacted by the dog presence as well as the effective implementation of such programmes. It is important that studies use appropriate sample sizes to enable confidence in the detection of meaningful effects. Additionally, there is a need for practitioners and researchers to work together to evaluate specific reading to dog's curricula in order to ensure any benefits are maximised and studies comparable.

## Supporting Information

**S1 Appendix. PRISMA Checklist**  
(DOCX)

**S2 Appendix. Duplications Removed from the Review**  
(DOCX)

## Author Contributions

Conceived and designed the experiments: SSH NRG DSM. Performed the experiments: SSH NRG DSM. Analyzed the data: SSH NRG DSM. Contributed reagents/materials/analysis tools: SSH NRG DSM. Wrote the paper: SSH NRG DSM.

## References

1. Cree A, Kay A, Steward J. The economic and social cost illiteracy: a snapshot of illiteracy in a global context. World Literacy Foundation. 2012. Available: [http://www.worldliteracyfoundation.org/The\\_Economic\\_&\\_Social\\_Cost\\_of\\_Illiteracy.pdf](http://www.worldliteracyfoundation.org/The_Economic_&_Social_Cost_of_Illiteracy.pdf). Accessed 9 March 2015.
2. Martinez R, Fernandez A. The social and economic impact of illiteracy: Analytical model and pilot study. OREALC. 2010. Available: <http://unesdoc.unesco.org/images/0019/001905/190571E.pdf>. Accessed 9 March 2015.
3. Clark C, Douglas J. Young people's reading and writing: An in-depth study focusing on enjoyment, behaviour, attitudes and attainment. London: National Literacy Trust; 2011.
4. Ecklund BK, Lamon KM. Improving reading achievement through increased motivation, specific skill enhancement, and practice time for elementary students. Education Resources Information Centre. 2008. Available: <http://files.eric.ed.gov/fulltext/ED503058.pdf>. Accessed 16 March 2015.
5. Sainsbury M, Schagen I. Attitudes towards reading at ages nine and eleven. *J Res Reading*. 2004; 27(4): 373–386.
6. Department for Education. Reading for pleasure. 2012. Available: <http://www.education.gov.uk/schools/teachingandlearning/pedagogy/b00192950/encouraging-reading-for-pleasure>. Accessed 10 December 2013.
7. Tales of JOY R.E.A.D. Program. Final Data Report for the 2014 to 2015 School Year. Available: [http://www.therapyanimals.org/Research\\_&\\_Results\\_files/TOJ%20End%20of%20Year%202014%20-%202015.pdf](http://www.therapyanimals.org/Research_&_Results_files/TOJ%20End%20of%20Year%202014%20-%202015.pdf). Accessed 01 February 2016
8. Shaw DM. Man's best friend as a reading facilitator? *Read Teach*. 2013; 66: 365–371
9. Gutrie JT, Cox KE. Classroom conditions for motivation and engagement in reading. *Educ Psychol Rev*. 2001; 13: 283–302.
10. Hii S, Harackiewicz, J. Motivating the academically unmotivated: a critical issue for the 21st century. *Rev Educ Res*. 2000; 70: 151–179.
11. Wigfield A, Guthrie JT. Motivation for reading: individual, home, textual, and classroom perspective. *Educ Psychol*. 1997; 32: 57–135.
12. Jalongo MR, Hirsh RA. Understanding reading anxiety: new insights from neuroscience. *Early Child Educ J*. 2010; 37: 431–435
13. Zbornik J. Reading anxiety manifests itself emotionally, intellectually. *Today's School Psychologist*. 2001. Available: <http://www.lkwipl.org/schools/specialed/zbornik3.htm>. Accessed 16 March 2015
14. Amsterlaw J, Lagattuta K, Meltzoff A. Young children's reasoning about the effects of emotional and physiological states on academic performance. *Child Dev*. 2009; 80: 115–133. doi: [10.1111/j.1467-8624.2008.01249.x](https://doi.org/10.1111/j.1467-8624.2008.01249.x) PMID: [19236396](https://pubmed.ncbi.nlm.nih.gov/19236396/)
15. Oxford Centre for Evidence Based Medicine. Available: <http://www.cebm.net/oxford-centre-evidence-based-medicine-levels-evidence-march-2009/>. Accessed 14 September 2015
16. Moher D, Liberati A, Tetzlaff J, Altman DG. Preferred reporting items for systematic reviews and meta-analyses: the PRISMA statement. *Ann Intern Med*. 2009; 151(4): 264–269. PMID: [19622511](https://pubmed.ncbi.nlm.nih.gov/19622511/)
17. Bueche S. Going to the dogs: Therapy dogs promote reading. *Reading Today*. 2003; 20(4): 46.
18. Burns R, DiLonardo, MJ. READING paws: For giving young readers confidence (and cuddles). Atlanta. 2014. Available: <http://www.atlantamagazine.com/2014/reading-paws/>. Accessed 25 March.
19. Dunlap VM. Canine assisted therapy and remediating reading: A review of literature. Thesis for degree of education, Northern Michigan University. 2010. Available: [http://wwwd.nmu.edu/sites/DrupalEducation/files/UserFiles/Files/Pre-Drupal/SiteSections/Students/GradPapers/EdSpecialist/Dunlap\\_Vicki\\_EP.pdf](http://wwwd.nmu.edu/sites/DrupalEducation/files/UserFiles/Files/Pre-Drupal/SiteSections/Students/GradPapers/EdSpecialist/Dunlap_Vicki_EP.pdf). Accessed 16 March 2015.
20. Faver C. Finding a voice: Animals helping children. *Reflections: Narratives of professional helping*. 2009; 15: 21.
21. Francis A. Thursdays with MacGyver. 2009. Available: <http://fplparentplace.com/wp-content/uploads/2012/08/Thursdays-with-MacGyver.pdf>. Accessed 25 March.
22. Hughes K. See spot read. *Public Libraries*. 2002; 41(6): 328–330.

23. Inklebarger T. Dog therapy 101. *American Libraries*. 2014; 45. Available: <http://americanlibrariesmagazine.org/wp-content/uploads/2015/01/1114.pdf>. Accessed 25 March 2015.
24. Jalongo MR. "What are all these dogs doing at school?" Using therapy dogs to promote children's reading practice. *Child Educ*. 2005; 81(3): 152–158.
25. Club Kennel. One tail wags, another child reads. *Education*. 2011; 447: 5.
26. Klotz K. Promoting humane education through Intermountain Therapy Animals' R.E.A.D. program. In Jalongo MR, editor. *Teaching compassion: Humane education in early childhood*. New York: Springer; 2014. pp. 175–195.
27. Lane HB, Zavada DW. When reading gets ruff: canine-assisted reading programmes. *Read Teach*. 2013; 67: 87–95.
28. Pillow-Price K, Yonts N, Stinson L. Sit, stay, read: Improving literacy skills using dogs! *Dimensions of Early Childhood*. 2014; 42: 5–9. Available: [http://www.southernearlychildhood.org/upload/pdf/SitStayRead\\_D42\\_1.pdf](http://www.southernearlychildhood.org/upload/pdf/SitStayRead_D42_1.pdf). Accessed 25 March 2015.
29. Shannon M. The benefits of children's reading to dogs in public libraries and after school centers: An exploratory study. Master's thesis, Queens College of the City University of New York. Available: <http://readtothedogs.org/READthesis.pdf>. Accessed 10 November 2014.
30. Shaw DM. Man's best friend as a reading facilitator. *Read Teach*. 2013; 66(5): 365–371.
31. Siegel WL. The role of animals in education. *ReVision*. 2004; 27: 17–26.
32. Snider B. Gone to the dogs. *Edutopia*. 2007. Available: <http://www.edutopia.org/read-with-rover>. Accessed 28 January 2015.
33. Truett C, Becnel K. Paws for reading: North Carolina libraries go to the dogs. *Public Libraries*. 2011; 50(4): 44–47. Available: <http://publiclibrariesonline.org/2013/04/paws-for-reading-north-carolina-libraries-go-to-the-dogs/>. Accessed 25 March.
34. University of Tennessee College of Veterinary Science. Patient pup helps elementary schools dare to love reading. *Curriculum Review*. 2015; 54(5): 4.
35. Friesen L. How a therapy dog may inspire student literacy engagement in the elementary language arts classroom. [Special issue.] *LEARNING Landscapes*. 2009; 3(1): 105–122
36. Friesen L. Potential for the role of school-based animal-assisted literacy mentoring programs. *Lang Lit*. 2010; 12(1): 21–37.
37. Friesen L, Delisle E. Animal-assisted literacy: A supportive environment for constrained and unconstrained learning. *Child Educ Int*. 2012; 88: 102–107.
38. Jalongo MR, Astorino T, Bomboy N. Canine visitors: The influence of therapy dogs on young children's learning and well-being in classrooms and hospitals. *Early Child Educ J*. 2004; 32(1): 9–16.
39. Black S. Sit, stay, and read. *Am Sch Board J*. 2009; 196(12): 36–37.
40. Konarski J. More than just a class pet: Reading therapy dogs and young readers with autism. Report. Available: <http://jkonarski.cmswiki.wikispaces.net/file/view/More+Than+Just+A+Class+Pet+Reading+Therapy+Dogs+And+Young+Readers+With+Autism.rtf>. Accessed 16 March 2015.
41. Gallatin E. How Reading Education Assistance Dogs (READ dogs) in an elementary intervention program are perceived by teachers and students. *School of Education Paper 24*. 2014. Available: [http://digitalcommons.hamline.edu/hse\\_all/24/](http://digitalcommons.hamline.edu/hse_all/24/). Accessed 16 March 2015.
42. Fisher B, Cozens M. The BaRK (Building Reading Confidence for Kids) canine assisted reading program: one child's experience. *Lit LearN*. 2014; 22 (1): 70. ISSN: 1320-5692.
43. Grigore AA, Rusu AS. Interaction with a therapy dog enhances the effects of social story method in autistic children. *Society & Animals*. 2014; 1–21. Available: [file:///C:/Users/Hall/Downloads/Rusu\\_Society\\_Animals\\_2014.pdf](file:///C:/Users/Hall/Downloads/Rusu_Society_Animals_2014.pdf). Accessed 25 March 2015.
44. Heyer J. The impact of animals with struggling readers. Master's thesis, Augsburg College. Minneapolis. 2007.
45. Intermountain Therapy Animals. 2011. Available: <http://www.therapyanimals.org/R.E.A.D.html>. Accessed 10 December 2014.
46. Kaymen MS. Exploring animal-assisted therapy as a reading intervention strategy. Master's thesis, Dominican University of California, CA. Available: <http://files.eric.ed.gov/fulltext/ED490729.pdf>. Accessed 16 March 2015.
47. Lloyd J, Sorin, R. "I liked that you can pat the dog and interact with it and read to it"—Engaging the imagination: The effect of the Classroom Canines™ program on reading and social/emotional skills of selected primary school students. Imaginative Education Research Group (IERG) 9th International Conference on Imagination and Education—Imagination: The Great workhorse of learning, July 2–4 2014. Canada. Available: <http://ierg.ca/how-we-c.../conferences/conference-proceedings/>. Accessed 16 March 2015.

48. Newlin R. Paws for reading. *Sch Libr J*. 2003; 49(6): 43.
49. Walsh AE. Impact of animal assisted therapy on oral reading fluency of second graders. Doctoral thesis, State University of New York at Fredonia. 2014. Available: [https://dspace.sunyconnect.suny.edu/bitstream/handle/1951/64521/Alison\\_Eckert\\_Masters\\_Project\\_May2014.pdf?sequence=1&isAllowed=y](https://dspace.sunyconnect.suny.edu/bitstream/handle/1951/64521/Alison_Eckert_Masters_Project_May2014.pdf?sequence=1&isAllowed=y). Accessed 16 March 2015.
50. Griess JO. A canine audience: the effect of animal-assisted therapy on reading progress among students identified with learning disabilities. Doctoral thesis, University of South Florida. 2010. ISBN-978-1-1242-6712-8.
51. Smith MH, Meehan C. All ears reading program and home-schooled youth. Final report: UCD Veterinary Medicine Extension, University of California, CA. 2010. Available: <https://www.yumpu.com/en/document/view/11807739/all-ears-readingtm-tony-la-russas-animal-rescue-foundation>. Accessed 16 March 2015.
52. Martin S. R.E.A.D. is a pawisitive programme for kids of all ages. *Interaction*. 2001; 19: 7–8.
53. Bassette LA, Taber-Doughty T. The effects of a dog reading visitation program on academic engagement behavior in three elementary students with emotional and behavioral disabilities: A single case design. *Child Youth Care Forum*. 2013; 43(2): 239–256.
54. Moore EG, Hlava T, Garcia SL, Brem S. Ever try teaching a dog to read? Implicit theories of reading ability. *Anthrozoos*. 2013; 26(3): 381–393.
55. Paradise JL. An analysis of improving student performance through the use of registered therapy dogs serving as motivators for reluctant readers. Doctoral thesis, University of Central Florida, Orlando, Florida. 2007. Available: [http://etd.fcla.edu/CF/CFE0001561/Paradise\\_Julie\\_L\\_200705\\_Ed\\_D.pdf](http://etd.fcla.edu/CF/CFE0001561/Paradise_Julie_L_200705_Ed_D.pdf). Accessed 16 March 2015.
56. Booten AE. Effects of animal-assisted therapy on behavior and reading in the classroom. Undergraduate thesis, Marshall University. 2011. Available: <http://mds.marshall.edu/cgi/viewcontent.cgi?article=1023&context=etd>. Accessed 25 March 2015.
57. Lenihan D, McCobb E, Freeman LM, Diurba A. Benefits of reading assistance dogs. Grant report. Available: [http://static1.squarespace.com/static/548526e8e4b0f7c06c1fcd52/t/54874ffae4b0d1e2d74c6c1c/1418153978168/benefits\\_of\\_reading\\_assistance\\_dogs+copy.pdf](http://static1.squarespace.com/static/548526e8e4b0f7c06c1fcd52/t/54874ffae4b0d1e2d74c6c1c/1418153978168/benefits_of_reading_assistance_dogs+copy.pdf). Accessed 1 January 2015.
58. Petersen A. The Effect of Experiences with Animals on the Reading Comprehension Skills of Students in the Seventh Grade. Doctoral thesis for degree of education, Alliant International University. 2008. Available: <http://files.eric.ed.gov/fulltext/ED502998.pdf>. Accessed 25 March 2015.
59. Smith CE. An analysis and evaluation of sit stay read: is the program effective in improving student engagement and reading outcomes? Doctoral thesis, National-Louis University, Chicago, IL. 2009. Available: <http://digitalcommons.nl.edu/cgi/viewcontent.cgi?article=1032&context=diss>. Accessed 16 March 2015.
60. Treat WA. Animal-Assisted literacy instruction for students with identified learning disabilities: Examining the effects of incorporating a therapy dog into guided oral reading sessions. Undergraduate thesis, UC Santa Cruz. 2013. Available: <https://escholarship.org/uc/item/6552t4mx>. Accessed 25 March.
61. Wohlfarth R, Mutschler B, Beetz A, Schleider K. An investigation into the efficacy of therapy dogs on reading performance in 6–7 year old children. *Hum Anim Int Bull*. 2014; 2: 60–73.
62. Friedmann E, Katcher A, Thomas S, Lynch J, Messene P. Social interaction and blood pressure: influence of animal companions. *J Nerv Ment Dis*. 1983; 171(8): 461–465. PMID: [6875529](https://pubmed.ncbi.nlm.nih.gov/6875529/)
63. Le Roux MC, Swartz L, Swartz E. The effect of an animal-assisted reading program on the reading rate, accuracy and comprehension of grade 3 students: A randomized control study. *Child Youth Care Forum*. 2014; 43(6): 655–673.
64. Lambourne K, Tomporowski P. The effect of exercise-induced arousal on cognitive task performance: a meta-regression analysis. *Brain Res*. 2010; 1341: 12–24 doi: [10.1016/j.brainres.2010.03.091](https://doi.org/10.1016/j.brainres.2010.03.091) PMID: [20381468](https://pubmed.ncbi.nlm.nih.gov/20381468/)
65. Tomporowski PD, Davis CL, Miller PH, Naglieri JA. Exercise and children's intelligence, cognition, and academic achievement. *Educ Psychol Rev*. 2008; 20(2), 111–131. PMID: [19777141](https://pubmed.ncbi.nlm.nih.gov/19777141/)
66. Hanin YL. (1997). Emotions and athletic performance: Individual zones of optimal functioning model. *Eur Yearbook Sport Psychol*. 1997; 1: 29–72.
67. Hanin YL. *Emotions in Sport*. Champaign, Illinois: Human Kinetics. 2000.
68. Everson HT, Smodlaka I, Tobias S. Exploring the relationship of test anxiety and metacognition on reading test performance: a cognitive analysis. *Anxiety Stress Coping*. 1994; 7: 85–96.
69. Ialongo N, Edelson G, Werthamer-Larsson L, Crockett L, Kellam S. The significance of self-reported anxious symptoms in first-grade children. *J Abnorm Child Psychol*. 1994; 22: 441–455. PMID: [7963077](https://pubmed.ncbi.nlm.nih.gov/7963077/)

70. Clark C, De Zoysa S. Mapping the interrelationships of reading enjoyment, attitudes, behaviour and attainment: An exploratory investigation. National Literacy Trust. 2011. Available: <http://files.eric.ed.gov/fulltext/ED541404.pdf>. Accessed 17 March 2015.
71. Henk WA, Melnick SA. The Reader Self-Perception Scale (RSPS): A new tool for measuring how children feel about themselves as readers. *Read Teach*. 1995; 48(6): 470–477.
72. Chapman JW, Tunmer WE. Reading Self-Concept Scale. In R. Burden (Ed.), *Children's self-perceptions*. Windsor, England: NFER-Nelson; 1999. pp. 29–34
73. Chapman JW, Tunmer WE, Prochnow JE. Early reading related skills and performance, reading self-concept, and the development of academic self-concept: A longitudinal study. *J Educ Psychol*. 2000; 92: 703–708.
74. Marsh HW, Yeung AS. Causal effects of academic self-concept on academic achievement: Structural equation models of longitudinal data. *J Educ Psychol*. 1997; 89: 41–54.
75. Blunsdon B, Reed K, McNeil N. Experiential learning in social science theory: An investigation of the relationship between student enjoyment and learning. *J Further Higher Educ*. 2003; 27(1): 3–14.
76. OECD. PISA 2009 results: Learning to learn—student engagement, strategies and practices (Volume III). 2010. Available: <http://dx.doi.org/10.1787/9789264083943-en>. Accessed 12 January 2015.
77. Ryan RM, Deci EL. Intrinsic and extrinsic motivations: Classic definitions and new directions. *Contemp Educ Psychol*. 2000; 25: 54–67. PMID: [10620381](https://pubmed.ncbi.nlm.nih.gov/10620381/)
78. Wang J, Guthrie JT. Modelling the effects of intrinsic motivation, extrinsic motivation, amount of reading, and past reading achievement on text comprehension between US and Chinese students. *Read Res Q*. 2004; 39(2): 162–186.
79. Logan S, Medford E, Hughes N. The importance of intrinsic motivation for high and low ability readers' reading comprehension performance. *Learn Individ Differ*. 2011; 21(1): 124–128.
80. Wigfield A, Guthrie JT. Relations of children's motivation for reading to the amount and breadth of their reading. *J Educ Psychol*. 1997; 89: 420–432.
81. Guthrie JT, Wigfield A. Engagement and motivation in reading. In Kamil ML, Mosenthal PB, Pearson PD, Barr R, editors. *Reading research handbook (Vol. 3)*. Mahwah, NJ: Erlbaum; 2000. pp. 403–424.
82. Martin F, Farnum J. Animal-assisted therapy for children with pervasive developmental disorders. *West J Nurs Res*. 2002; 24: 657–670. PMID: [12365766](https://pubmed.ncbi.nlm.nih.gov/12365766/)
83. Silva K, Correia R, Lima M, Magalhaes A, de Sousa L. Can dogs prime autistic children for therapy? Evidence from a single case study. *J Altern Complement Med*. 2011; 17: 1–5.
84. Hergovich A, Monshi B, Semmler G, Ziegelmayer V. The effects of the presence of a dog in the classroom. *Anthrozoös*. 2002; 15: 37–50.
85. Anderson KL, Olson MR. The value of a dog in a classroom of children with severe emotional disorders. *Anthrozoös*. 2006; 19(1): 35–49.
86. Gee NR, Harris SL, Johnson KL. The role of therapy dogs in speed and accuracy to complete motor skill tasks for preschool children. *Anthrozoös*. 2007; 20: 375–386.
87. Gee NR, Crist EN, Carr DN. Preschool children require fewer instructional prompts to perform a memory task in the presence of a dog. *Anthrozoös*. 2010; 23: 173–184.
88. Gee NR, Sherlock TR, Bennett EA, Harris SL. Preschoolers' adherence to instruction as a function of presence of a dog and motor skill task. *Anthrozoös*. 2009; 22: 267–276.
89. Gee NR, Church MT, Altobelli CL. Preschoolers make fewer errors on an object categorization task in the presence of a dog. *Anthrozoös*. 2010; 23: 223–230.
90. Gee NR, Belcher JM, Grabski JL, DeJesus M, Riley W. The presence of a therapy dog results in improved object recognition performance in preschool children. *Anthrozoös*. 2012; 25(3): 289–300.
91. McConnell AR, Brown CM, Shoda TM, Stayton LE, Martin CE. Friends with benefits: on the positive consequences of pet ownership. *J Pers Soc Psychol*. 2011; 101(6): 1239. doi: [10.1037/a0024506](https://doi.org/10.1037/a0024506) PMID: [21728449](https://pubmed.ncbi.nlm.nih.gov/21728449/)
92. Rosenberg M. *Society and the adolescent self-image*. Princeton, NJ: Princeton University Press; 1965.
93. Van Houtte BA, Jarvis PA. The role of pets in preadolescent psychosocial development. *J Appl Dev Psychol*. 1995; 16(3): 463–479.
94. Bergesen FJ. The effects of pet facilitated therapy on the self-esteem and socialization of primary school children. Presented at the 5th International Conference on the relationship between humans and animals. Monaco; 1989.

95. Grandgeorge M, Tordjman S, Lazartigues A, Lemonnier E, Deleau M, Hausberger M. Does pet arrival trigger prosocial behaviors in individuals with autism? *PLoS one*. 2012; 7 (8):e41739. doi: [10.1371/journal.pone.0041739](https://doi.org/10.1371/journal.pone.0041739) PMID: [22870246](https://pubmed.ncbi.nlm.nih.gov/22870246/)
96. Lang UE, Jansen JB, Wertenaue F, Gallinat J, Rapp MA. Reduced anxiety during dog assisted interviews in acute schizophrenic patients. *Eur J IntegrMed*. 2010; 2(3): 123–127.
97. O'Haire M. Companion animals and human health: Benefits, challenges, and the road ahead. *J Vet Behav*. 2010; 5(5): 226–234.
98. Somerville JW, Swanson AM, Robertson RL, Arnett MA, MacLin OH. Handling a dog by children with attention-deficit/hyperactivity disorder: Calming or exciting. *N Am J Psychol*. 2009; 11.1: 111–120.
99. Beetz A, Julius H, Turner D, Kotrschal K. Effects of social support by a dog on stress modulation in male children with insecure attachment. *Front Psychol*. 2012; 3.
100. Viau R, Arsenault-Lapierre G, Fecteau S, Champagne N, Walker CD, Lupien S. Effect of service dogs on salivary cortisol secretion in autistic children. *Psychoneuroendocrinology*. 2010; 35(8): 1187–1193. doi: [10.1016/j.psyneuen.2010.02.004](https://doi.org/10.1016/j.psyneuen.2010.02.004) PMID: [20189722](https://pubmed.ncbi.nlm.nih.gov/20189722/)
101. Gee NR, Friedmann E, Stendahl M, Fisk A, Coglitore V. Heart rate variability during a working memory task: Does touching a dog or person affect the response? *Anthrozoos*. 2014; 27(4): 513–528.
102. O'Haire ME, McKenzie SJ, Beck AM, Slaughter V. Animals may act as social buffers: Skin conductance arousal in children with autism spectrum disorder in a social context. *Dev Psychobiol*. 2015. Available [http://www.researchgate.net/profile/Virginia\\_Slaughter/publication/275525679\\_Animals\\_may\\_act\\_as\\_social\\_buffers\\_Skin\\_conductance\\_arousal\\_in\\_children\\_with\\_autism\\_spectrum\\_disorder\\_in\\_a\\_social\\_context\\_Animals\\_and\\_Autism/links/5547d8a80cf26a7bf4da9948.pdf](http://www.researchgate.net/profile/Virginia_Slaughter/publication/275525679_Animals_may_act_as_social_buffers_Skin_conductance_arousal_in_children_with_autism_spectrum_disorder_in_a_social_context_Animals_and_Autism/links/5547d8a80cf26a7bf4da9948.pdf). Accessed 27 May 2015.
103. Beck AM, Katcher AH. Future directions in human-animal bond research. *Am Behav Sci*. 2003; 47(1): 79–93
104. Kruger KA, Serpell JA. Animal-assisted interventions in mental health: definitions and theoretical foundations. In: Fine AH, editor. *Handbook on animal-assisted therapy: Theoretical foundations and guidelines for practice*. Academic Press, San Diego, CA; 2006. pp. 21–38
105. McNicholas J, Collis GM. Animals as social supports: insights for understanding animal-assisted therapy. In: Fine AH, editor. *Handbook on animal-assisted therapy: Theoretical foundations and guidelines for practice*. Academic Press, San Diego, CA; 2006. pp. 49–71.
106. Wilson EO. *Biophilia*. Harvard university press, Cambridge, MA; 1984.
107. Mills D, Hall S. Animal-assisted interventions: making better use of the human-animal bond. *Vet Rec*. 2014; 174(11): 269–273. doi: [10.1136/vr.g1929](https://doi.org/10.1136/vr.g1929) PMID: [24627508](https://pubmed.ncbi.nlm.nih.gov/24627508/)
108. New J, Cosmides L, Tooby J. Category-specific attention for animals reflects ancestral priorities, not expertise. *Proc Natl Acad Sci*. 2007; 104(42): 16598–16603. PMID: [17909181](https://pubmed.ncbi.nlm.nih.gov/17909181/)
109. LoBue V, Bloom Pickard M, Sherman K, Axford C, DeLoache JS. Young children's interest in live animals. *Br J Devel Psychol*. 2013; 31(1): 57–69.
110. Schuck SEB, Emmerson N, Fine AH, Lakes KD. Canine-assisted therapy for Children with ADHD: preliminary findings from the Positive Assertive Cooperative Kids study. *J Atten Disord*. 2013; doi:1087054713502080.
111. Friedmann E. The animal–human bond: health and wellness. In: *Handbook on animal assisted therapy: Theoretical foundations and guidelines for practice* (Fine A. H., ed.), Academic Press, New York; 2000. pp. 41–58.
112. Friedmann E, Son H, Tsai C. The animal-human bond: Health and wellness. *Handbook on animal-assisted therapy: theoretical foundations and guidelines for practice*; 2000. pp. 41–58.
